# Supplementary material for: Association between Traumatic Subarachnoid Hemorrhage and Acute Respiratory Failure in Moderate-to-Severe Traumatic Brain Injury Patients
Source: J Clin Med. 2022 Jul 10;11(14):3995. doi: 10.3390/jcm11143995 (PMC9318973; doi:10.3390/jcm11143995)
Supplement: Supplementary file 1 [file jcm-11-03995-s001.zip › supplement table S3.xlsx]

## Sheet: supplement table S3
id	ARF	aspiration	intubation	lung_consolidation	more_than3000ml	operation	gender	age	GCS	mutiple injury	EDH	SDH	brain contusion	midline shift	compression of basal cistern	DM	HTN	STROKE	smoke	COPD	HEART	IVH	high grade_SAH	pExpose	pNoExpose	pAssign	pMin
14783127	1	1	1	1	0	1	0	38	7	1	0	0	1	1	2	0	0	0	0	0	0	1	1	0.570678	0.429322	0.570678	0.429322
13624766	0	0	0	1	0	1	1	44	8	2	0	0	1	1	2	0	0	0	1	0	0	1	1	0.787642	0.212358	0.787642	0.212358
13949688	0	0	0	0	0	1	1	65	7	2	0	1	1	1	1	0	0	0	1	0	0	1	1	0.839895	0.160105	0.839895	0.160105
14644480	1	1	1	1	1	1	1	72	9	1	0	0	1	0	0	1	0	0	0	0	0	0	1	0.239247	0.760753	0.239247	0.239247
15148006	1	1	1	1	1	1	1	59	6	1	0	1	1	1	2	0	1	0	1	0	0	1	1	0.855706	0.144294	0.855706	0.144294
14681250	1	1	1	0	1	1	1	61	4	2	0	0	1	1	1	0	0	0	1	0	0	1	1	0.541376	0.458624	0.541376	0.458624
13624652	1	0	0	1	1	1	1	52	3	1	0	0	1	0	0	0	0	0	0	0	0	0	1	0.138511	0.861489	0.138511	0.138511
15230367	0	0	0	0	1	1	1	52	11	1	0	0	1	1	1	0	0	0	1	0	0	0	1	0.385663	0.614337	0.385663	0.385663
14592334	0	0	0	0	0	1	1	59	3	1	0	1	1	1	1	0	0	0	0	0	0	0	1	0.32177	0.67823	0.32177	0.32177
15053907	1	1	0	0	1	1	1	60	6	2	0	1	1	1	1	0	0	0	0	0	0	1	1	0.801503	0.198497	0.801503	0.198497
14555941	1	0	1	0	0	1	1	53	7	1	0	0	1	0	0	0	0	0	0	0	0	1	1	0.510151	0.489849	0.510151	0.489849
13898448	1	1	1	1	1	1	1	51	3	2	0	1	1	0	2	0	0	0	0	0	0	1	1	0.859233	0.140767	0.859233	0.140767
14245332	0	1	0	1	0	1	1	66	6	1	0	0	1	1	1	0	0	0	0	0	0	1	1	0.34567	0.65433	0.34567	0.34567
14611373	0	0	0	1	1	1	1	45	5	2	0	1	1	1	1	0	0	0	0	0	0	0	1	0.516268	0.483732	0.516268	0.483732
15125050	0	0	0	0	1	1	1	43	7	2	0	1	1	1	2	0	0	0	1	0	0	0	1	0.79672	0.20328	0.79672	0.20328
15094553	1	1	1	0	1	1	1	55	10	2	0	0	1	0	1	0	1	0	1	0	0	1	1	0.671189	0.328811	0.671189	0.328811
15161020	0	1	0	0	1	1	0	36	6	1	0	0	1	1	1	0	0	0	0	0	0	0	1	0.143068	0.856932	0.143068	0.143068
14882706	1	0	0	0	1	0	1	70	12	1	0	0	1	0	1	0	1	0	1	0	1	1	1	0.648696	0.351304	0.648696	0.351304
14545981	0	1	1	0	1	1	1	57	6	2	0	0	1	1	0	0	0	0	1	0	0	1	1	0.553706	0.446294	0.553706	0.446294
13523722	0	1	0	0	0	1	1	56	5	1	0	0	1	1	1	0	0	0	0	0	0	0	1	0.103164	0.896836	0.103164	0.103164
14438784	0	1	0	0	0	1	1	64	3	1	0	1	1	1	1	0	0	0	1	0	0	1	1	0.575305	0.424695	0.575305	0.424695
14076081	0	1	0	1	0	1	0	47	3	1	1	1	1	1	1	0	0	0	0	0	0	1	1	0.646594	0.353406	0.646594	0.353406
15060662	0	0	1	0	0	1	1	53	5	2	0	1	1	1	1	0	0	0	1	0	0	0	1	0.493548	0.506452	0.493548	0.493548
14888615	0	0	0	0	0	1	0	68	6	1	0	0	1	1	0	0	0	0	0	0	0	1	1	0.444412	0.555588	0.444412	0.444412
13922041	1	1	1	0	1	1	1	49	4	1	0	1	1	1	0	0	0	0	1	0	0	0	1	0.319124	0.680876	0.319124	0.319124
13797355	0	1	0	0	0	1	1	67	3	2	0	1	1	1	1	0	0	0	0	0	0	1	1	0.652835	0.347165	0.652835	0.347165
14712998	0	1	0	0	1	1	1	54	8	1	0	0	1	1	1	0	0	0	0	0	0	0	1	0.201818	0.798182	0.201818	0.201818
14510722	0	1	1	0	1	1	1	50	10	1	0	0	1	0	1	0	0	0	1	0	0	0	1	0.265589	0.734411	0.265589	0.265589
14714463	0	1	0	0	0	1	0	68	5	1	0	1	1	1	2	0	0	0	0	0	0	1	1	0.790865	0.209135	0.790865	0.209135
14681459	1	1	0	1	1	1	1	40	4	1	1	0	1	1	2	0	0	0	0	0	0	1	1	0.721799	0.278201	0.721799	0.278201
13585311	0	1	0	0	1	1	0	59	12	1	0	1	1	1	0	0	0	0	0	0	0	0	1	0.50887	0.49113	0.50887	0.49113
15080418	1	1	0	0	0	1	1	68	12	1	0	0	1	0	0	0	0	0	0	0	0	0	1	0.195473	0.804527	0.195473	0.195473
14393867	0	1	0	0	0	1	1	61	12	1	0	0	1	1	1	0	0	0	1	0	0	1	1	0.568674	0.431326	0.568674	0.431326
14181219	1	1	1	0	0	1	1	59	7	2	0	0	1	1	0	0	0	0	1	0	0	1	1	0.484852	0.515148	0.484852	0.484852
14515482	1	1	1	0	1	1	1	30	7	1	1	1	1	1	2	0	0	0	0	0	0	0	1	0.767394	0.232606	0.767394	0.232606
12514275	1	0	0	1	1	0	1	50	3	1	1	0	1	1	0	0	0	0	1	0	0	0	1	0.14294	0.85706	0.14294	0.14294
14167041	0	1	0	0	0	1	0	75	7	1	1	0	1	1	0	0	0	0	0	0	0	1	1	0.516624	0.483376	0.516624	0.483376
14553956	0	1	1	1	1	1	1	43	3	2	0	1	1	1	2	0	0	0	0	0	0	1	1	0.859261	0.140739	0.859261	0.140739
15276684	1	1	1	0	1	1	1	61	7	2	0	0	1	1	1	0	0	0	1	0	0	0	1	0.267812	0.732188	0.267812	0.267812
13574578	0	1	0	0	0	1	0	58	12	1	0	1	1	0	0	1	1	0	0	0	0	0	1	0.427703	0.572297	0.427703	0.427703
15247321	1	0	0	0	0	1	1	60	5	1	0	0	1	0	0	0	0	0	0	0	0	1	1	0.426193	0.573807	0.426193	0.426193
14768386	0	1	1	0	1	0	1	46	6	2	0	1	1	1	0	0	0	0	0	0	0	1	1	0.68318	0.31682	0.68318	0.31682
14837262	0	1	1	0	1	1	1	50	5	2	1	0	1	0	2	0	0	0	0	0	0	0	1	0.546149	0.453851	0.546149	0.453851
13676845	0	1	1	1	0	1	1	40	10	1	0	1	1	1	0	0	0	0	1	0	0	0	1	0.351916	0.648084	0.351916	0.351916
14154079	0	1	1	0	1	0	1	31	9	1	0	1	1	0	0	0	0	0	0	0	0	0	1	0.29183	0.70817	0.29183	0.29183
14659150	1	0	1	1	1	1	1	57	9	1	0	0	1	1	0	0	0	0	0	0	0	1	1	0.64095	0.35905	0.64095	0.35905
15051438	1	1	1	1	1	1	0	68	6	2	0	0	1	1	2	0	0	0	0	0	0	1	1	0.732729	0.267271	0.732729	0.267271
13978517	1	1	1	1	0	1	0	27	4	2	0	0	1	0	1	0	0	0	0	0	0	0	1	0.099964	0.900036	0.099964	0.099964
14808372	1	1	0	0	1	1	1	21	5	1	0	0	1	1	2	0	0	0	0	0	0	1	1	0.629901	0.370099	0.629901	0.370099
13766976	0	1	0	0	0	1	0	54	9	1	0	0	1	0	1	0	0	0	0	0	0	0	1	0.144185	0.855815	0.144185	0.144185
15083455	0	0	1	0	0	1	1	66	12	1	1	0	1	0	0	0	1	0	1	0	1	0	1	0.478098	0.521902	0.478098	0.478098
15018533	1	1	1	0	1	1	1	41	3	2	0	1	1	1	0	0	0	0	1	0	0	0	1	0.360143	0.639857	0.360143	0.360143
14757725	1	1	1	1	1	1	1	51	9	1	1	0	1	0	1	0	0	0	0	0	0	0	1	0.33612	0.66388	0.33612	0.33612
14129343	0	0	1	0	0	1	1	46	9	1	0	1	1	1	1	0	0	0	0	0	0	0	1	0.522816	0.477184	0.522816	0.477184
13937552	0	1	1	0	0	1	1	60	10	2	0	0	1	0	0	0	0	0	1	0	0	0	1	0.230161	0.769839	0.230161	0.230161
14260491	0	1	1	1	1	1	1	24	7	1	0	0	1	1	1	0	0	0	0	0	0	0	1	0.160999	0.839001	0.160999	0.160999
14577273	0	0	1	0	0	1	1	52	12	2	1	1	1	1	2	0	1	0	1	0	0	0	1	0.90189	0.0981099	0.90189	0.0981099
14126660	0	0	0	0	0	1	0	57	6	1	0	0	1	1	0	0	0	0	1	0	0	0	1	0.149164	0.850836	0.149164	0.149164
13893120	1	0	1	1	0	1	1	49	4	2	1	0	1	1	1	0	0	0	0	0	0	1	1	0.65952	0.34048	0.65952	0.34048
14849586	0	1	1	0	1	1	1	45	11	1	0	1	1	0	0	0	0	0	0	0	0	0	1	0.514175	0.485825	0.514175	0.485825
14713344	0	1	0	0	1	1	1	38	7	1	1	1	1	1	1	0	0	0	0	0	0	0	1	0.558809	0.441191	0.558809	0.441191
14604174	1	1	1	0	0	1	1	53	9	2	1	0	1	1	1	0	0	0	1	0	0	1	1	0.725664	0.274336	0.725664	0.274336
15061708	0	0	0	0	0	1	1	58	7	2	0	1	1	0	0	0	0	0	0	0	0	0	1	0.481627	0.518373	0.481627	0.481627
14559670	1	1	1	1	1	1	0	74	3	2	0	0	1	1	0	0	1	0	0	0	0	1	1	0.372417	0.627583	0.372417	0.372417
13618795	0	1	0	0	1	1	1	42	7	1	0	1	1	0	0	0	0	0	0	0	0	0	1	0.362042	0.637958	0.362042	0.362042
15107256	1	1	1	0	1	1	1	56	7	2	0	0	1	0	0	0	0	0	0	0	0	0	1	0.22884	0.77116	0.22884	0.22884
14082907	1	0	1	0	1	1	1	71	6	2	0	1	1	0	0	0	0	0	1	0	0	0	1	0.598838	0.401162	0.598838	0.401162
14313128	0	1	1	0	1	1	1	45	3	2	1	0	1	1	1	0	0	0	0	0	0	1	1	0.637408	0.362592	0.637408	0.362592
13913806	0	0	0	0	0	1	1	30	6	1	0	1	1	0	0	0	0	0	0	0	0	0	1	0.345716	0.654284	0.345716	0.345716
14855625	1	1	1	0	1	1	1	42	5	1	0	0	1	0	2	0	0	0	0	0	0	1	1	0.665371	0.334629	0.665371	0.334629
14811767	1	1	1	1	1	1	1	58	3	1	0	1	1	1	0	0	0	0	0	0	0	1	1	0.622152	0.377848	0.622152	0.377848
13978797	0	1	0	0	0	1	1	27	6	2	0	1	1	0	0	0	0	0	1	0	0	0	1	0.313979	0.686021	0.313979	0.313979
14598720	0	0	0	0	0	0	1	45	4	1	0	1	1	1	0	0	0	0	1	0	0	1	1	0.526077	0.473923	0.526077	0.473923
13935783	1	0	1	1	1	1	1	52	10	2	0	0	1	0	0	0	0	0	1	0	0	1	1	0.741597	0.258403	0.741597	0.258403
14098125	0	1	0	0	0	1	0	41	7	1	0	0	1	0	0	0	0	0	0	0	0	0	1	0.0971105	0.902889	0.0971105	0.0971105
13015237	0	1	0	0	0	1	1	62	6	1	1	0	1	1	2	0	0	0	1	0	0	1	1	0.738289	0.261711	0.738289	0.261711
14733932	1	1	1	0	1	1	1	48	6	1	0	1	1	0	0	0	0	0	0	0	0	0	1	0.363021	0.636979	0.363021	0.363021
14538879	1	1	1	1	1	0	1	60	7	2	0	0	1	0	0	0	0	0	0	0	0	0	1	0.119482	0.880518	0.119482	0.119482
13664270	0	1	1	0	1	1	1	20	7	2	0	1	1	0	0	0	0	0	1	0	0	0	1	0.461456	0.538544	0.461456	0.461456
14118923	1	1	0	1	1	1	1	78	7	1	0	1	1	0	0	0	0	0	1	0	0	0	1	0.362293	0.637707	0.362293	0.362293
13771013	0	1	1	0	0	1	0	66	5	1	0	1	1	1	0	0	0	0	0	0	0	0	1	0.244544	0.755456	0.244544	0.244544
14149885	0	1	1	0	0	1	1	48	8	2	0	0	1	0	0	0	0	0	0	0	0	0	1	0.177872	0.822128	0.177872	0.177872
13754810	0	0	0	1	0	1	1	27	3	2	0	1	1	0	0	0	0	0	0	0	0	0	1	0.30317	0.69683	0.30317	0.30317
14159102	0	0	0	0	0	1	1	60	9	1	0	0	1	0	0	0	1	0	0	0	0	0	1	0.189149	0.810851	0.189149	0.189149
14982496	1	1	1	0	1	1	1	56	3	1	0	0	1	0	0	0	0	0	0	0	0	0	1	0.11278	0.88722	0.11278	0.11278
14279046	1	1	0	0	0	0	0	52	11	1	0	0	1	0	0	0	0	0	0	0	0	0	1	0.0883361	0.911664	0.0883361	0.0883361
14867971	0	0	0	0	1	1	1	41	5	2	0	0	1	1	0	0	0	0	0	0	0	1	1	0.599549	0.400451	0.599549	0.400451
14748909	0	1	1	0	0	1	1	62	8	2	0	1	1	0	0	0	0	0	0	0	0	0	1	0.417269	0.582731	0.417269	0.417269
16041901	1	1	1	0	1	1	1	50	3	1	0	1	1	0	0	0	0	0	0	0	0	0	1	0.282317	0.717683	0.282317	0.282317
14595769	0	1	1	0	0	1	1	41	5	1	0	1	1	1	1	0	0	0	0	0	0	0	1	0.277698	0.722302	0.277698	0.277698
14495320	0	0	1	0	0	1	1	38	10	1	0	1	1	1	0	0	0	0	1	0	0	0	1	0.511449	0.488551	0.511449	0.488551
13574156	0	1	1	0	0	1	1	51	8	1	1	1	1	1	0	0	0	0	0	0	0	0	1	0.484876	0.515124	0.484876	0.484876
14388693	0	0	1	1	1	1	0	53	5	1	0	1	1	1	0	0	0	0	0	0	0	0	1	0.405808	0.594192	0.405808	0.405808
14669016	1	1	1	1	1	1	1	56	3	2	0	0	1	0	2	0	0	0	1	0	0	0	1	0.308324	0.691676	0.308324	0.308324
13771056	0	1	1	0	0	1	0	70	9	1	0	0	1	0	0	0	0	0	0	0	0	0	1	0.145441	0.854559	0.145441	0.145441
14495091	1	1	1	0	1	1	1	32	7	2	0	0	1	0	0	0	0	0	0	0	0	0	1	0.214925	0.785075	0.214925	0.214925
14362485	0	0	1	0	0	1	0	71	6	1	0	1	1	0	0	0	1	0	0	0	1	0	1	0.3907	0.6093	0.3907	0.3907
15022992	0	0	1	1	0	1	1	31	6	1	0	0	1	0	0	0	0	0	1	0	0	0	1	0.142543	0.857457	0.142543	0.142543
15274511	1	1	0	0	1	1	1	68	8	2	0	1	1	1	0	0	0	0	0	0	0	0	1	0.500234	0.499766	0.500234	0.499766
14345943	0	0	1	0	0	1	1	43	10	1	0	1	1	0	0	0	0	0	0	0	0	0	1	0.504723	0.495277	0.504723	0.495277
15250524	0	1	1	0	1	1	0	52	4	1	0	0	1	1	0	0	0	0	0	0	0	1	1	0.37696	0.62304	0.37696	0.37696
96050808	0	1	0	1	0	1	0	43	3	1	1	0	1	0	0	0	0	0	0	0	0	1	1	0.32729	0.67271	0.32729	0.32729
13626620	0	1	1	0	0	1	0	41	5	1	0	0	1	0	0	0	0	0	0	0	0	0	1	0.0853734	0.914627	0.0853734	0.0853734
14340554	0	0	0	0	0	1	1	65	11	2	0	1	1	1	1	0	0	0	0	0	0	0	1	0.660459	0.339541	0.660459	0.339541
13434593	0	0	1	0	0	1	1	55	8	1	0	1	1	1	0	0	0	0	0	0	0	0	1	0.455733	0.544267	0.455733	0.455733
14329979	0	1	0	0	0	1	0	54	11	2	0	0	1	0	0	0	0	0	1	0	0	0	1	0.213023	0.786977	0.213023	0.213023
14314593	0	0	1	0	0	0	1	40	3	2	0	0	1	0	1	0	0	0	1	0	0	1	1	0.349474	0.650526	0.349474	0.349474
13946070	0	0	0	0	0	1	1	44	4	1	0	1	1	1	2	0	0	0	0	0	0	0	1	0.55048	0.44952	0.55048	0.44952
14900151	1	1	1	0	1	1	1	55	9	2	0	0	1	1	0	0	0	0	1	0	0	1	1	0.643319	0.356681	0.643319	0.356681
14699940	1	1	0	0	0	1	1	45	12	2	0	0	1	0	0	0	0	0	0	0	0	0	1	0.240936	0.759064	0.240936	0.240936
15235690	1	1	1	0	1	1	1	27	5	1	0	1	1	1	2	0	0	0	0	0	0	0	1	0.57138	0.42862	0.57138	0.42862
15104638	1	1	1	1	1	1	1	66	6	1	1	1	1	1	0	0	0	0	0	0	0	0	1	0.507533	0.492467	0.507533	0.492467
14520681	0	1	1	0	0	1	0	47	10	1	0	1	1	1	0	0	0	0	0	0	0	0	1	0.367456	0.632544	0.367456	0.367456
14832360	1	0	0	0	0	0	1	26	12	1	0	0	1	0	0	0	0	0	1	0	0	0	1	0.159846	0.840154	0.159846	0.159846
14251289	0	0	0	0	0	1	1	60	9	1	0	1	1	0	0	0	0	0	0	0	0	0	1	0.460156	0.539844	0.460156	0.460156
14636698	1	1	1	0	0	1	1	62	7	2	0	0	1	0	0	0	0	0	1	0	0	0	1	0.171061	0.828939	0.171061	0.171061
15069835	0	0	1	0	0	1	1	60	8	2	0	0	1	0	0	0	0	0	0	0	0	0	1	0.272711	0.727289	0.272711	0.272711
14582004	1	1	1	1	0	1	1	66	4	1	0	1	1	1	0	0	1	0	1	0	0	0	1	0.193929	0.806071	0.193929	0.193929
15123690	1	0	0	0	1	1	1	48	11	1	0	0	1	0	0	0	1	0	1	0	0	0	1	0.31049	0.68951	0.31049	0.31049
13924986	0	0	1	0	1	1	1	44	5	1	0	1	1	1	1	0	0	0	0	0	0	0	1	0.493023	0.506977	0.493023	0.493023
14830546	0	0	0	0	0	1	1	30	7	1	0	1	1	1	0	0	0	0	0	0	0	0	1	0.375385	0.624615	0.375385	0.375385
14803832	1	1	1	1	1	1	1	47	8	1	0	0	1	0	0	0	0	0	0	0	0	1	1	0.475076	0.524924	0.475076	0.475076
14297734	0	1	0	0	0	1	0	48	5	2	0	1	1	1	0	0	0	0	0	0	0	0	1	0.278818	0.721182	0.278818	0.278818
13701852	0	0	1	0	0	1	1	60	5	1	0	1	1	0	1	0	0	0	1	0	0	0	1	0.409008	0.590993	0.409008	0.409008
12274193	0	1	0	0	0	1	1	63	6	1	0	0	1	1	0	0	1	0	0	0	0	0	1	0.0888989	0.911101	0.0888989	0.0888989
14267385	0	1	0	0	0	1	0	56	7	2	0	0	1	0	0	0	0	0	0	0	0	1	1	0.420809	0.579191	0.420809	0.420809
13551117	0	1	0	0	0	0	1	29	10	1	0	1	1	1	0	0	0	0	0	0	0	0	1	0.217673	0.782327	0.217673	0.217673
15171395	0	1	1	0	0	1	0	47	9	2	0	1	1	1	0	0	0	0	0	0	0	0	1	0.414789	0.585211	0.414789	0.414789
15118590	1	1	0	0	1	1	1	38	6	1	1	1	1	0	0	0	0	0	1	0	0	0	1	0.491879	0.508121	0.491879	0.491879
14903026	1	1	1	1	1	1	1	59	4	2	1	0	1	1	0	1	0	1	1	0	0	0	1	0.311957	0.688043	0.311957	0.311957
14906824	1	1	1	0	1	1	1	57	4	1	1	0	1	1	0	0	0	0	0	0	0	0	1	0.216805	0.783195	0.216805	0.216805
14186980	1	1	1	0	0	1	1	62	10	2	1	0	1	1	0	1	0	0	1	0	0	0	1	0.424103	0.575897	0.424103	0.424103
14738511	1	1	1	1	1	1	1	48	7	1	1	0	0	1	1	0	0	0	1	0	0	1	1	0.425912	0.574088	0.425912	0.425912
13665913	1	0	1	0	0	1	1	61	6	1	0	0	0	0	1	0	0	0	0	0	0	1	1	0.302223	0.697777	0.302223	0.302223
13992245	0	1	0	0	0	1	0	45	4	2	0	1	0	1	1	0	0	0	0	0	0	0	1	0.135246	0.864754	0.135246	0.135246
13677254	0	0	0	0	0	1	1	78	4	1	1	0	0	1	2	0	0	0	0	0	0	0	1	0.252554	0.747446	0.252554	0.252554
15175644	1	0	0	0	1	1	1	63	8	1	1	0	0	0	2	0	0	0	0	0	0	0	1	0.432787	0.567213	0.432787	0.432787
13786629	0	1	0	0	0	1	1	51	5	1	1	1	0	1	2	0	0	0	1	0	0	0	1	0.402558	0.597442	0.402558	0.402558
13917774	0	0	0	0	0	1	1	30	6	1	0	1	0	1	2	0	0	0	0	0	0	0	1	0.379428	0.620572	0.379428	0.379428
13696602	1	1	1	0	1	1	1	30	7	1	0	1	0	1	2	0	0	0	0	0	0	0	1	0.407592	0.592408	0.407592	0.407592
14535138	1	1	1	1	1	1	1	53	4	1	0	1	0	1	2	0	0	0	0	0	0	0	1	0.30637	0.69363	0.30637	0.30637
14253341	0	0	1	1	0	0	1	21	10	2	0	1	0	1	2	0	0	0	0	0	0	0	1	0.407901	0.592099	0.407901	0.407901
14856463	1	1	0	0	0	1	1	68	8	2	0	1	0	1	2	0	0	0	1	0	0	0	1	0.434653	0.565347	0.434653	0.434653
14041752	1	1	1	1	1	1	1	44	10	1	0	1	0	1	2	0	0	0	1	0	0	0	1	0.48067	0.51933	0.48067	0.48067
13925724	1	1	0	1	1	1	1	47	3	1	0	1	0	1	2	0	0	0	1	0	0	0	1	0.260012	0.739988	0.260012	0.260012
13889637	1	1	0	0	0	1	1	25	5	2	0	1	0	0	2	0	0	0	1	0	0	0	1	0.306609	0.693391	0.306609	0.306609
13956160	0	1	0	0	0	1	1	40	11	1	0	0	0	0	2	0	0	0	0	0	0	0	1	0.17703	0.82297	0.17703	0.17703
13923907	0	1	0	0	0	1	1	49	6	2	0	1	0	0	2	0	0	0	1	0	0	0	1	0.352152	0.647848	0.352152	0.352152
14230660	1	1	1	1	1	1	1	41	7	1	1	0	0	0	0	0	0	0	0	0	0	1	1	0.369147	0.630853	0.369147	0.369147
14377857	0	1	0	0	0	1	1	49	7	1	1	0	0	1	0	0	0	0	0	0	0	0	1	0.0852213	0.914779	0.0852213	0.0852213
13578962	0	1	1	1	0	1	1	56	5	2	1	0	0	1	0	0	0	0	1	0	0	1	1	0.317455	0.682545	0.317455	0.317455
13654577	1	1	0	0	1	1	1	59	4	1	1	1	0	1	0	0	0	0	0	0	0	0	1	0.243378	0.756622	0.243378	0.243378
14422055	1	1	1	0	0	1	0	75	4	1	1	1	0	1	0	0	1	0	0	0	0	1	1	0.468125	0.531875	0.468125	0.468125
14355692	0	1	1	0	1	1	1	65	9	1	1	0	0	1	0	0	1	0	1	0	0	0	1	0.158393	0.841607	0.158393	0.158393
14170958	0	1	0	0	1	1	1	61	5	1	1	0	0	1	0	0	0	0	0	0	0	0	1	0.100886	0.899114	0.100886	0.100886
13775901	0	1	0	0	1	1	0	53	4	1	1	1	0	1	0	0	0	0	0	0	0	0	1	0.215961	0.784039	0.215961	0.215961
15102631	1	1	0	1	1	1	1	24	4	2	1	0	0	1	0	0	0	0	1	0	0	0	1	0.101952	0.898048	0.101952	0.101952
13935995	0	1	1	1	0	1	1	29	8	1	1	0	0	1	0	0	0	0	0	0	0	0	1	0.0852671	0.914733	0.0852671	0.0852671
14627424	0	1	1	0	0	1	1	68	8	2	1	0	0	1	0	0	0	0	1	0	0	1	1	0.45511	0.54489	0.45511	0.45511
14566822	1	0	0	0	1	1	1	29	4	2	0	0	0	1	0	0	0	0	1	0	0	1	1	0.341999	0.658001	0.341999	0.341999
14938872	0	0	1	0	1	1	1	62	8	1	0	0	0	0	0	0	1	0	1	0	1	1	1	0.438377	0.561623	0.438377	0.438377
14972832	1	1	0	0	1	0	1	54	12	2	0	0	0	1	0	0	0	0	1	0	0	0	1	0.10054	0.89946	0.10054	0.10054
14713269	1	1	0	0	1	0	1	57	12	2	0	1	0	1	0	0	1	0	0	0	0	0	1	0.224797	0.775203	0.224797	0.224797
14613724	1	0	1	1	1	1	0	43	7	1	0	1	0	1	0	0	0	0	0	0	0	0	1	0.248356	0.751644	0.248356	0.248356
14368157	0	0	1	1	0	1	1	54	5	2	0	0	0	0	0	0	0	0	1	0	0	0	1	0.0808946	0.919105	0.0808946	0.0808946
15175090	0	0	1	1	0	1	0	33	4	1	0	1	0	1	0	0	0	0	0	0	0	1	1	0.404923	0.595077	0.404923	0.404923
14902261	1	1	1	0	1	1	1	35	4	1	1	0	0	1	2	0	0	0	0	0	0	1	0	0.568372	0.431628	0.431628	0.431628
14665921	1	1	1	0	0	1	1	72	4	1	0	1	1	1	2	0	0	0	0	0	0	1	0	0.806963	0.193037	0.193037	0.193037
14563448	1	1	1	1	1	1	1	73	4	1	0	1	1	1	2	0	0	0	0	0	0	1	0	0.844159	0.155841	0.155841	0.155841
15023044	1	1	0	0	1	1	1	58	6	2	0	1	0	1	0	0	0	0	1	0	0	0	0	0.238396	0.761604	0.761604	0.238396
13787219	0	0	0	0	0	0	1	52	9	1	0	1	1	1	2	0	0	0	1	0	0	1	0	0.854626	0.145374	0.145374	0.145374
12645401	1	1	1	0	1	1	0	59	4	1	0	1	1	0	2	0	0	0	0	0	0	0	0	0.53939	0.46061	0.46061	0.46061
13875834	0	1	0	0	0	1	1	39	9	2	1	0	0	1	0	0	0	0	0	0	0	0	0	0.138366	0.861634	0.861634	0.138366
14466880	0	1	1	1	0	1	0	48	9	1	0	0	1	1	0	0	0	0	0	0	0	1	0	0.385789	0.614211	0.614211	0.385789
14445734	0	1	0	0	0	1	1	73	8	1	0	1	1	0	0	0	0	0	0	0	0	0	0	0.320501	0.679499	0.679499	0.320501
14627516	1	1	1	0	1	1	1	75	9	1	0	1	1	1	0	0	0	0	0	0	0	1	0	0.810794	0.189206	0.189206	0.189206
13634584	1	1	1	1	1	1	0	66	9	2	0	1	1	1	0	0	0	0	0	0	0	0	0	0.497322	0.502678	0.502678	0.497322
15187249	1	1	1	1	1	1	1	55	3	2	1	1	1	0	1	0	0	0	1	0	0	1	0	0.834678	0.165322	0.165322	0.165322
14724950	0	0	1	0	0	1	1	24	5	1	0	1	1	0	0	0	0	0	1	0	0	0	0	0.344682	0.655318	0.655318	0.344682
13815176	0	1	1	1	1	1	1	45	12	1	1	0	0	0	0	0	0	0	0	0	0	1	0	0.526631	0.473369	0.473369	0.473369
14301040	1	1	0	1	1	1	1	47	4	1	0	1	1	1	2	0	0	0	0	0	0	1	0	0.819293	0.180707	0.180707	0.180707
14726123	1	1	0	0	1	1	1	45	10	2	1	0	1	0	2	0	0	0	0	0	0	0	0	0.66541	0.33459	0.33459	0.33459
13935661	0	0	0	0	0	1	0	54	6	1	0	0	1	1	0	0	0	0	0	0	0	0	0	0.142794	0.857206	0.857206	0.142794
14664961	1	1	1	0	1	0	1	65	3	1	1	1	1	1	0	0	0	0	0	0	0	1	0	0.658548	0.341452	0.341452	0.341452
14963643	0	1	0	1	1	1	0	59	12	2	0	1	1	0	0	0	0	0	0	0	0	0	0	0.554209	0.445791	0.445791	0.445791
14333666	1	1	1	0	0	1	0	47	3	2	0	0	0	0	2	0	0	0	0	0	0	0	0	0.10337	0.89663	0.89663	0.10337
14675654	0	0	0	0	0	1	1	45	8	1	1	1	1	0	0	0	0	0	0	0	0	0	0	0.575875	0.424125	0.424125	0.424125
13963304	0	1	1	0	0	1	0	37	8	1	0	1	1	0	0	0	0	0	0	0	0	1	0	0.658747	0.341253	0.341253	0.341253
13708522	0	1	1	0	1	1	1	64	8	1	0	0	1	1	0	0	1	0	0	0	0	1	0	0.492675	0.507325	0.507325	0.492675
14313435	1	1	1	1	1	1	1	47	4	2	0	0	1	0	0	0	0	0	1	0	0	1	0	0.443492	0.556508	0.556508	0.443492
14933264	0	0	0	0	1	1	1	38	8	2	0	0	1	1	0	0	0	0	0	0	0	0	0	0.32353	0.67647	0.67647	0.32353
14494418	0	1	0	0	1	1	0	65	6	2	0	1	1	0	2	0	0	0	0	0	0	0	0	0.660226	0.339774	0.339774	0.339774
14242049	0	1	1	1	0	1	1	74	8	2	0	1	0	0	0	0	0	0	0	0	0	0	0	0.201503	0.798497	0.798497	0.201503
15279123	1	1	1	0	1	1	1	30	9	2	0	0	1	0	0	0	0	0	1	0	0	0	0	0.265206	0.734794	0.734794	0.265206
14902054	0	0	0	0	0	1	1	49	7	1	0	1	0	1	2	0	0	0	0	0	0	1	0	0.766013	0.233987	0.233987	0.233987
13700157	1	1	0	0	1	1	0	70	6	1	0	1	0	1	2	0	0	0	0	0	0	1	0	0.72054	0.27946	0.27946	0.27946
14587008	0	1	1	0	1	0	1	62	10	1	0	0	1	0	0	1	0	0	1	0	0	1	0	0.497263	0.502737	0.502737	0.497263
13596421	1	1	1	1	1	1	1	42	7	2	0	0	1	0	0	0	0	0	0	0	0	0	0	0.195724	0.804276	0.804276	0.195724
14173494	0	1	1	0	0	1	1	65	7	1	0	1	1	1	2	0	0	0	0	0	0	0	0	0.567852	0.432148	0.432148	0.432148
14226383	0	1	0	0	0	0	1	52	10	1	1	0	1	0	1	0	0	0	0	0	0	1	0	0.486475	0.513525	0.513525	0.486475
15119816	0	1	0	0	0	1	0	70	3	2	1	1	0	1	2	0	1	0	0	0	0	1	0	0.732825	0.267175	0.267175	0.267175
14441644	0	0	0	0	0	1	1	27	6	1	0	0	1	0	0	0	0	0	0	0	0	0	0	0.142117	0.857883	0.857883	0.142117
14329105	1	1	1	0	1	1	1	56	3	2	1	1	1	1	0	0	0	0	1	0	0	0	0	0.534731	0.465269	0.465269	0.465269
14829320	1	1	1	0	1	1	1	35	7	2	1	1	1	1	0	0	0	0	0	0	0	1	0	0.884147	0.115853	0.115853	0.115853
14577572	1	0	0	1	1	0	1	52	10	2	0	1	0	1	0	0	0	0	0	0	0	0	0	0.268011	0.731989	0.731989	0.268011
14626935	0	1	0	0	1	1	1	49	9	1	0	1	1	0	0	0	0	0	0	0	0	0	0	0.427668	0.572332	0.572332	0.427668
13579567	1	1	1	0	1	1	1	23	6	1	0	0	1	0	0	0	0	0	0	0	0	1	0	0.430286	0.569714	0.569714	0.430286
14238287	0	0	1	0	0	0	1	49	8	2	0	0	1	1	2	0	1	0	0	0	0	1	0	0.68122	0.31878	0.31878	0.31878
13936695	1	1	1	1	1	1	1	50	9	2	0	1	1	1	1	0	0	0	1	0	0	0	0	0.552994	0.447006	0.447006	0.447006
14678326	1	1	1	0	1	1	1	30	6	1	0	1	1	1	0	0	0	0	0	0	0	0	0	0.351104	0.648896	0.648896	0.351104
14372140	0	0	1	0	0	1	1	49	8	2	0	0	1	0	1	0	0	0	0	0	0	0	0	0.296429	0.703571	0.703571	0.296429
13938397	0	1	1	0	1	1	0	53	9	1	1	1	1	1	1	0	0	0	0	0	0	0	0	0.632979	0.367021	0.367021	0.367021
14711300	0	0	1	1	1	1	1	46	7	1	1	0	1	1	0	0	0	0	0	0	0	1	0	0.717225	0.282775	0.282775	0.282775
15185387	0	1	0	0	0	0	0	65	9	2	0	0	1	0	0	0	0	0	0	0	0	0	0	0.0999709	0.900029	0.900029	0.0999709
15101394	1	1	0	1	1	1	1	31	4	1	0	1	1	0	1	0	0	0	0	0	0	1	0	0.631031	0.368969	0.368969	0.368969
14900577	0	1	0	0	0	1	0	73	6	2	0	0	1	1	0	1	1	0	0	0	0	0	0	0.144091	0.855909	0.855909	0.144091
14987864	0	0	1	1	0	1	1	48	9	1	0	1	0	1	2	0	0	0	1	0	0	0	0	0.480282	0.519718	0.519718	0.480282
13606966	1	1	1	1	1	1	1	39	3	1	0	0	1	0	1	0	0	0	1	0	0	1	0	0.361071	0.638929	0.638929	0.361071
14137555	1	1	1	0	0	1	1	19	6	2	0	1	1	1	0	0	0	0	0	0	0	0	0	0.336042	0.663958	0.663958	0.336042
15193470	0	0	0	0	1	1	1	53	4	2	0	1	1	1	0	0	0	0	1	0	0	0	0	0.495881	0.504119	0.504119	0.495881
13924539	0	1	1	0	1	1	1	56	7	2	0	0	1	0	0	0	0	0	0	0	0	0	0	0.22884	0.77116	0.77116	0.22884
15138562	0	0	1	0	0	1	1	55	5	1	0	1	0	0	0	0	1	0	0	0	0	0	0	0.161407	0.838593	0.838593	0.161407
13952662	1	1	1	1	1	1	1	51	3	1	1	1	1	1	2	0	0	0	1	0	0	1	0	0.896182	0.103818	0.103818	0.103818
14137023	0	1	0	0	0	1	1	49	11	1	1	0	0	0	1	0	0	0	0	0	0	0	0	0.149174	0.850826	0.850826	0.149174
13952812	0	1	1	0	0	1	1	66	6	2	0	0	1	0	2	0	1	0	0	0	0	1	0	0.663149	0.336851	0.336851	0.336851
14186167	1	1	1	1	1	1	1	63	8	2	0	1	1	1	0	0	0	0	1	0	0	0	0	0.493732	0.506268	0.506268	0.493732
14429407	1	1	1	1	1	1	1	67	9	2	0	1	1	1	1	0	0	0	0	0	0	0	0	0.564243	0.435757	0.435757	0.435757
14477967	0	0	0	0	0	1	1	42	4	2	1	1	0	1	1	0	0	0	0	0	0	1	0	0.712287	0.287713	0.287713	0.287713
14544595	0	1	0	1	1	1	1	65	11	1	0	1	1	1	0	0	0	0	0	0	0	0	0	0.473016	0.526984	0.526984	0.473016
15155356	0	1	1	0	1	1	1	61	3	2	0	1	1	0	0	0	0	0	1	0	0	0	0	0.372849	0.627151	0.627151	0.372849
13925011	0	1	1	0	1	1	1	55	10	1	0	0	0	0	1	0	1	0	1	0	0	1	0	0.362884	0.637116	0.637116	0.362884
96182215	0	0	0	0	0	1	1	60	7	2	0	0	1	0	0	0	0	0	0	0	0	0	0	0.228531	0.771469	0.771469	0.228531
14334053	0	0	0	0	0	1	1	28	3	1	0	0	1	0	2	0	0	0	1	0	0	1	0	0.599884	0.400116	0.400116	0.400116
14796007	0	0	0	0	0	1	0	64	5	1	1	0	0	1	2	0	0	0	0	0	0	1	0	0.627703	0.372297	0.372297	0.372297
14538671	0	0	0	0	1	1	1	56	11	1	0	0	1	0	0	0	0	0	1	0	0	0	0	0.34866	0.65134	0.65134	0.34866
15162167	0	0	1	0	1	1	1	67	9	2	0	1	1	1	0	0	0	0	0	0	0	0	0	0.678429	0.321571	0.321571	0.321571
15180659	1	1	1	0	0	1	1	49	7	1	0	1	1	1	2	0	0	0	1	0	1	0	0	0.610449	0.389551	0.389551	0.389551
15048723	0	1	0	0	0	1	1	31	4	1	0	1	0	0	0	0	0	0	1	0	0	1	0	0.314141	0.685859	0.685859	0.314141
14225127	0	0	0	0	0	1	1	53	8	1	0	0	1	1	1	0	0	0	1	0	0	1	0	0.566216	0.433784	0.433784	0.433784
14385443	0	0	0	0	1	1	0	62	8	2	0	0	1	0	1	0	0	0	0	0	0	1	0	0.711881	0.288119	0.288119	0.288119
13937405	0	0	1	0	0	0	1	50	6	1	0	0	1	1	1	0	1	0	0	0	0	0	0	0.0967527	0.903247	0.903247	0.0967527
15272310	1	1	0	0	0	1	1	60	8	2	0	0	1	0	2	0	1	0	1	0	0	1	0	0.696447	0.303553	0.303553	0.303553
13861240	0	0	0	0	0	0	1	45	3	1	0	1	1	1	2	0	0	0	0	0	0	0	0	0.362075	0.637925	0.637925	0.362075
13994734	1	1	1	0	1	1	0	55	4	1	0	0	1	1	0	0	0	0	1	0	0	0	0	0.119644	0.880356	0.880356	0.119644
13672127	0	0	0	0	0	1	1	49	8	1	0	1	1	0	1	0	0	0	1	0	0	0	0	0.465685	0.534315	0.534315	0.465685
14631863	1	1	1	1	1	1	0	39	4	2	0	1	1	1	1	0	0	0	0	0	0	0	0	0.361093	0.638907	0.638907	0.361093
13009163	0	0	0	0	0	1	0	67	9	1	0	1	0	1	0	0	0	0	0	0	0	0	0	0.243924	0.756076	0.756076	0.243924
15107946	0	1	0	1	0	1	1	57	12	1	0	0	1	1	0	0	0	0	1	0	0	0	0	0.176624	0.823376	0.823376	0.176624
14767235	0	1	1	0	0	1	1	57	7	1	0	1	1	0	0	0	0	0	0	0	0	0	0	0.305523	0.694477	0.694477	0.305523
13847021	0	1	1	0	1	1	1	34	8	2	1	0	0	0	0	0	0	0	0	0	0	0	0	0.189527	0.810473	0.810473	0.189527
14181243	0	1	0	0	0	1	0	34	4	2	0	1	0	0	0	0	0	0	0	0	0	0	0	0.11222	0.88778	0.88778	0.11222
14627947	0	1	0	0	0	1	0	31	6	2	1	0	0	0	0	0	0	0	0	0	0	0	0	0.0882855	0.911714	0.911714	0.0882855
14103732	0	0	0	0	0	1	1	52	9	1	0	0	1	1	1	0	0	0	1	0	0	1	0	0.592482	0.407518	0.407518	0.407518
15246330	1	1	1	0	1	1	1	53	3	2	0	1	1	1	1	0	0	0	1	0	0	0	0	0.41767	0.58233	0.58233	0.41767
14512563	1	1	1	1	1	1	0	73	9	2	0	1	0	0	0	0	0	0	0	0	0	0	0	0.281966	0.718034	0.718034	0.281966
13770508	0	1	1	0	1	1	1	38	12	1	0	0	1	0	0	0	0	0	1	0	0	0	0	0.277018	0.722982	0.722982	0.277018
14765795	0	0	0	0	0	1	1	39	7	2	0	1	1	1	0	0	0	0	0	0	0	0	0	0.471189	0.528811	0.528811	0.471189
14642746	0	0	0	0	0	0	0	71	4	1	0	1	1	0	0	0	1	0	0	0	0	1	0	0.469486	0.530514	0.530514	0.469486
14326793	1	1	0	1	0	1	1	65	5	1	0	1	1	1	2	0	1	0	0	0	0	0	0	0.40632	0.59368	0.59368	0.40632
13978526	0	0	0	0	1	1	1	50	10	1	0	0	1	0	0	0	0	0	0	0	0	0	0	0.309512	0.690488	0.690488	0.309512
14553308	0	0	0	0	1	1	1	40	7	2	0	0	0	0	0	0	0	0	1	0	0	0	0	0.145629	0.854371	0.854371	0.145629
14131618	0	1	1	0	0	1	1	69	7	1	1	0	1	0	0	0	0	0	0	0	0	0	0	0.216045	0.783955	0.783955	0.216045
14225775	0	1	0	0	0	1	1	54	8	2	0	1	1	0	0	0	0	0	1	0	0	0	0	0.391917	0.608083	0.608083	0.391917
13622223	0	0	0	0	0	0	0	49	11	2	1	0	0	0	0	0	0	0	0	0	0	0	0	0.144281	0.855719	0.855719	0.144281
14977481	0	1	0	0	1	1	1	20	8	1	0	0	1	1	0	0	0	0	0	0	0	1	0	0.46761	0.53239	0.53239	0.46761
14325377	0	0	0	0	0	1	0	63	8	2	0	0	1	1	2	0	0	0	0	0	0	0	0	0.466203	0.533797	0.533797	0.466203
14260079	0	1	0	0	0	1	0	67	11	1	0	1	1	0	0	0	0	0	0	0	0	0	0	0.380047	0.619953	0.619953	0.380047
13763318	1	1	1	0	1	1	1	45	12	1	0	1	0	0	0	0	0	0	1	0	0	0	0	0.32786	0.67214	0.67214	0.32786
14306002	0	1	0	0	0	0	1	61	10	1	1	0	0	0	0	1	0	0	0	0	0	0	0	0.0850123	0.914988	0.914988	0.0850123
13857088	0	1	1	0	1	1	1	48	5	1	0	0	1	1	2	0	0	0	0	0	0	1	0	0.68694	0.31306	0.31306	0.31306
13936954	0	0	1	0	0	1	1	64	3	1	0	0	1	1	1	0	0	0	1	0	0	1	0	0.452725	0.547275	0.547275	0.452725
14312204	1	0	1	1	1	1	1	62	6	1	0	0	1	0	0	0	0	0	0	0	0	0	0	0.213025	0.786975	0.786975	0.213025
14827123	1	1	1	1	1	0	1	77	4	2	0	0	1	0	1	0	0	0	1	0	0	1	0	0.350395	0.649605	0.649605	0.350395
15159608	1	1	1	1	1	1	1	50	3	2	0	1	1	0	2	0	0	0	1	0	0	0	0	0.579737	0.420263	0.420263	0.420263
14580448	1	1	1	1	1	1	1	45	4	1	0	1	1	1	0	0	1	0	1	0	0	1	0	0.606558	0.393442	0.393442	0.393442
13859782	0	0	1	0	0	0	1	23	7	2	1	0	0	0	2	0	0	0	0	0	0	0	0	0.243108	0.756892	0.756892	0.243108
14152915	0	0	0	0	1	1	1	42	5	1	0	1	0	1	0	0	0	0	1	0	0	1	0	0.585766	0.414234	0.414234	0.414234
14381728	0	0	1	0	0	1	0	64	7	1	0	1	1	1	1	0	0	0	0	0	0	0	0	0.450438	0.549562	0.549562	0.450438
11205729	0	1	1	0	0	1	1	58	4	1	1	1	1	0	0	0	0	0	0	0	0	0	0	0.365067	0.634933	0.634933	0.365067
13198821	0	1	0	0	0	1	1	63	6	1	1	0	1	1	0	0	1	0	1	0	0	0	0	0.160257	0.839743	0.839743	0.160257
14767180	1	1	1	0	0	1	1	55	9	2	0	1	1	0	0	0	0	0	1	0	0	0	0	0.450118	0.549882	0.549882	0.450118
14785151	0	0	0	0	0	0	1	40	12	2	1	0	0	1	0	0	0	0	0	0	0	0	0	0.170634	0.829366	0.829366	0.170634
13628012	0	0	1	0	1	1	0	32	6	2	0	0	1	1	0	0	0	0	0	0	0	0	0	0.273475	0.726525	0.726525	0.273475
14853410	0	0	0	0	1	1	0	39	7	1	1	0	0	1	1	0	0	0	0	0	0	0	0	0.194622	0.805378	0.805378	0.194622
14179159	0	1	1	0	0	1	1	63	8	2	1	0	1	1	0	0	0	0	1	0	0	0	0	0.30964	0.69036	0.69036	0.30964
14687198	0	0	1	0	0	1	1	48	8	1	0	1	1	1	0	0	0	0	0	0	0	0	0	0.448336	0.551664	0.551664	0.448336
13936677	1	1	1	0	0	1	0	46	6	1	1	0	1	1	2	0	0	0	0	0	0	0	0	0.369664	0.630336	0.630336	0.369664
13331697	1	1	1	1	1	1	0	60	10	1	0	1	1	1	1	0	1	0	0	0	0	0	0	0.440971	0.559029	0.559029	0.440971
14479883	0	0	0	1	0	1	1	48	4	1	0	1	1	0	0	0	0	0	1	0	0	0	0	0.2791	0.7209	0.7209	0.2791
15046852	0	1	0	0	1	1	1	38	10	2	1	0	1	0	0	0	0	0	0	0	0	0	0	0.409505	0.590495	0.590495	0.409505
14797176	1	1	0	1	1	1	0	66	11	1	0	0	0	0	0	0	0	0	0	0	0	0	0	0.0902274	0.909773	0.909773	0.0902274
15108408	0	1	0	0	0	1	1	41	9	2	0	1	1	1	1	0	1	0	1	0	0	0	0	0.414655	0.585345	0.585345	0.414655
14742045	0	1	0	0	0	1	1	27	6	2	1	0	1	1	0	0	0	0	1	0	0	0	0	0.2177	0.7823	0.7823	0.2177
13882239	0	1	1	0	0	1	0	59	3	1	0	1	1	1	2	0	0	0	0	0	0	0	0	0.413888	0.586112	0.586112	0.413888
13700692	0	0	1	0	0	1	1	55	3	1	0	1	0	0	0	0	0	0	0	0	0	1	0	0.440775	0.559225	0.559225	0.440775
15020467	0	0	1	0	0	1	0	65	5	2	1	0	1	0	0	0	0	0	0	0	0	0	0	0.311109	0.688891	0.688891	0.311109
14852417	0	0	0	0	0	1	1	65	5	2	0	0	1	1	1	0	0	0	0	0	0	0	0	0.216823	0.783177	0.783177	0.216823
13911579	0	1	1	0	0	1	0	56	8	2	0	1	1	1	0	0	0	0	1	0	0	0	0	0.411978	0.588022	0.588022	0.411978
14302867	0	1	0	0	0	0	1	67	12	1	0	0	1	1	0	1	0	0	1	0	0	1	0	0.436804	0.563196	0.563196	0.436804
14504024	0	1	0	1	0	1	1	53	6	2	0	1	1	0	0	0	0	0	1	0	0	0	0	0.300359	0.699641	0.699641	0.300359
13937533	0	1	0	0	1	1	1	47	5	2	1	0	0	0	0	0	0	0	1	0	0	0	0	0.134092	0.865908	0.865908	0.134092
13978586	0	0	0	0	1	1	1	76	7	1	0	0	1	0	0	0	0	1	0	0	0	0	0	0.251147	0.748853	0.748853	0.251147
14669725	1	1	0	0	1	1	1	30	7	2	0	1	1	1	0	0	0	0	0	0	0	0	0	0.436963	0.563037	0.563037	0.436963
14176431	1	1	1	1	1	0	1	43	3	2	1	0	1	1	0	0	0	0	0	0	0	1	0	0.403001	0.596999	0.596999	0.403001
13676802	0	1	1	1	1	1	1	51	5	2	0	1	1	0	0	0	0	0	0	0	0	0	0	0.381115	0.618885	0.618885	0.381115
13537093	0	1	0	0	1	1	1	59	5	1	0	0	1	1	0	0	0	0	0	0	0	1	0	0.406695	0.593305	0.593305	0.406695
14893516	0	1	0	0	0	1	0	55	4	1	1	1	0	0	2	0	1	0	0	0	0	0	0	0.306507	0.693493	0.693493	0.306507
15264735	1	1	1	1	1	1	1	61	4	2	0	1	1	1	1	0	0	0	1	0	0	0	0	0.407818	0.592182	0.592182	0.407818
14193731	0	1	1	0	1	1	1	61	11	1	1	0	1	0	1	0	0	0	0	0	0	0	0	0.439282	0.560718	0.560718	0.439282
13643040	0	0	1	0	0	1	1	44	3	1	0	1	0	0	0	0	0	0	1	0	0	1	0	0.439432	0.560568	0.560568	0.439432
15151593	1	1	1	0	1	1	1	22	9	2	0	0	1	0	0	0	0	0	1	0	0	0	0	0.260003	0.739997	0.739997	0.260003
14527862	0	1	0	0	0	1	1	53	9	1	0	1	1	1	0	0	1	0	1	0	0	0	0	0.310017	0.689983	0.689983	0.310017
13701687	1	1	1	1	1	1	0	57	6	2	0	0	1	0	0	0	1	0	0	0	1	0	0	0.176139	0.823861	0.823861	0.176139
15097061	0	1	1	1	0	1	1	38	7	2	1	0	0	1	0	0	0	0	0	0	0	1	0	0.352677	0.647323	0.647323	0.352677
13924446	0	0	0	1	1	1	1	53	11	1	0	1	0	0	0	0	0	0	1	0	0	0	0	0.361596	0.638404	0.638404	0.361596
14590808	0	1	0	0	0	1	1	35	6	1	1	0	0	1	1	0	0	0	1	0	0	0	0	0.0849326	0.915067	0.915067	0.0849326
14057912	0	0	0	0	0	1	1	18	9	1	1	0	1	1	0	0	0	0	0	0	0	0	0	0.311167	0.688833	0.688833	0.311167
13979610	0	0	0	0	0	1	1	44	9	2	1	0	0	1	1	0	0	0	0	0	0	0	0	0.243626	0.756374	0.756374	0.243626
14278476	0	0	0	0	0	1	1	27	8	2	1	0	1	1	1	0	0	0	1	0	0	0	0	0.410018	0.589982	0.589982	0.410018
14541917	0	1	1	1	1	1	1	41	10	1	1	0	0	0	0	0	0	0	0	0	0	0	0	0.157916	0.842084	0.842084	0.157916
13924523	1	1	0	1	0	1	1	48	4	2	0	0	1	1	0	1	1	0	0	0	0	0	0	0.100864	0.899136	0.899136	0.100864
13938069	0	1	0	0	0	1	0	64	6	1	0	1	1	0	0	0	1	0	0	0	0	0	0	0.218486	0.781514	0.781514	0.218486
13883426	1	1	1	1	1	1	0	51	5	1	1	0	0	1	1	0	0	0	0	0	0	0	0	0.102057	0.897943	0.897943	0.102057
14946795	0	0	1	0	1	1	0	44	5	1	0	0	0	0	0	0	0	0	0	0	0	0	0	0.0855836	0.914416	0.914416	0.0855836
14885727	0	1	1	1	0	1	1	54	9	1	0	0	1	0	0	0	0	0	0	0	0	1	0	0.409663	0.590337	0.590337	0.409663
12259346	0	1	0	0	0	1	1	75	10	2	0	1	0	0	1	1	0	0	0	0	0	0	0	0.336609	0.663391	0.663391	0.336609
14407876	0	1	1	0	0	1	1	58	10	1	0	1	1	0	0	0	0	0	1	0	0	0	0	0.399191	0.600809	0.600809	0.399191
13689749	0	1	1	1	0	1	1	46	4	2	0	0	1	0	0	0	0	0	0	0	0	0	0	0.100458	0.899542	0.899542	0.100458
14852642	0	1	1	0	0	1	0	59	4	2	1	1	0	0	0	0	0	0	0	0	0	0	0	0.225724	0.774276	0.774276	0.225724
14426970	1	1	1	1	1	1	0	68	4	2	1	0	1	1	0	0	0	0	1	0	0	0	0	0.248219	0.751781	0.751781	0.248219
15129930	0	1	0	0	0	1	1	55	4	1	0	0	1	1	0	0	0	0	1	0	0	0	0	0.0809252	0.919075	0.919075	0.0809252
14249494	1	0	0	0	1	1	0	71	3	1	0	1	0	1	2	0	0	0	0	0	0	0	0	0.394705	0.605295	0.605295	0.394705
